# Supplementary material for: T-to-R switch of muscle fructose-1,6-bisphosphatase involves fundamental changes of secondary and quaternary structure
Source: PubMed Central journal article supplement (PMC4822563; doi:10.1107/s2059798316001765), 2016-03-30
Supplement: d-72-00536-sup1.pdf [file d-72-00536-sup1.pdf]

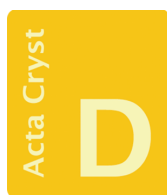

STRUCTURAL  
BIOLOGY

**Volume 72 (2016)**

**Supporting information for article:**

**T-to-R switch of muscle FBPase involves fundamental changes of secondary and quaternary structure**

**Jakub Barciszewski, Janusz Wisniewski, Robert Kolodziejczyk, Mariusz Jaskolski, Dariusz Rakus and Andrzej Dzugaj**

(a) R-state muscle FBPase denaturation curve

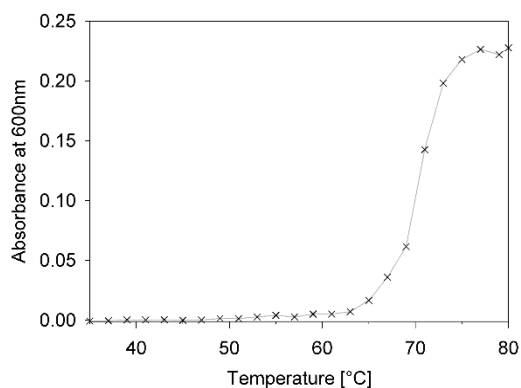

(b) R-state muscle FBPase derivative curve

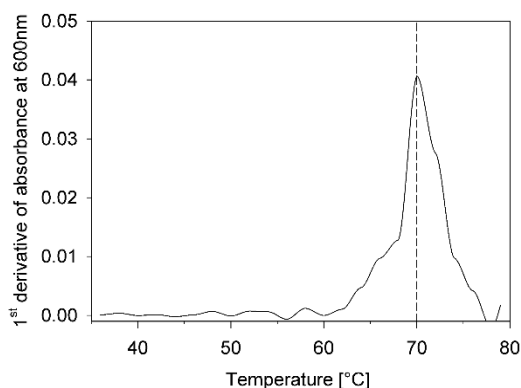

(c) T-state muscle FBPase denaturation curve

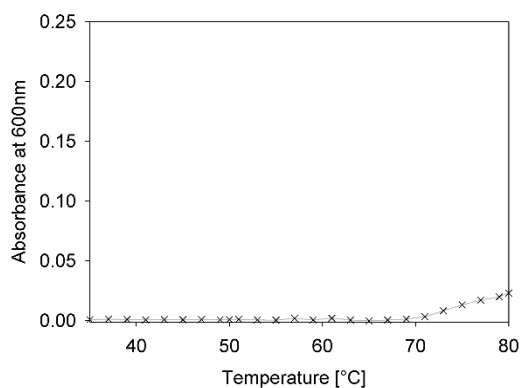

(d) T-state muscle FBPase derivative curve

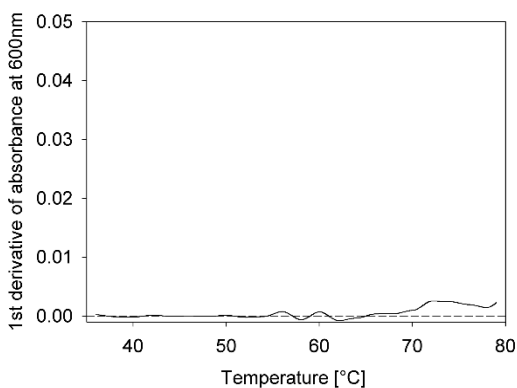

**Figure S1** Turbidimetric thermal denaturation and derivative curves for muscle FBPase. The denaturation curves were obtained by linear interpolation of the experimental data. The derivative curves were calculated using Savitzky-Golay filter (Savitzky & Golay, 1964). The protein in the R-state begins to precipitate at 65°C (a) with a melting temperature of 70°C (b). In the T-state, the protein does not begin to precipitate until 70°C and shows only minimal precipitation between 70°C and 80°C (c and d).

**Table S1** DSSP (Kabsch & Sander, 1983) assignment of secondary structure elements in the crystal structures of human muscle FBPase in T-state without AMP [T(-AMP)] described in this work and in wild type human muscle FBPase (PDB ID 4HE0) described previously by Shi *et al.* (2013).

Gaps in the sequence (...) indicate fragments that were not modeled in electron density.

| Secondary structure element          | Residue range |                   |
|--------------------------------------|---------------|-------------------|
|                                      | 4HE0          | T(-AMP)           |
| <b>Allosteric domain</b>             |               |                   |
| N-terminal                           | 7-12          | 11-12             |
| α1                                   | 13-20         | 13-19             |
| βα1                                  | -             | -                 |
| L1                                   | 21-23...27-28 | 20...29           |
| α2                                   | 29-49         | 30-49             |
| L2 ( <i>catalytic loop</i> )         | 50...71       | 50...72           |
| αL2                                  | -             | -                 |
| β1L2                                 | 59-63         | -                 |
| β2L2                                 | 69-71         | -                 |
| α3                                   | 72-86         | 73-86             |
| L3                                   | 87-90         | 87-90             |
| β1                                   | 91-96         | 91-96             |
| L4                                   | 97-112        | 97-112            |
| βL4                                  | 99-104        | 99-104            |
| αL4 (3 <sub>10</sub> <i>helix</i> )  | 107-109       | 107-109           |
| β2                                   | 113-121       | 113-118           |
| L5                                   | 122-131       | 119-122...130-131 |
| αL5 (3 <sub>10</sub> <i>helix</i> )  | 123-125       | -                 |
| β3                                   | 132-140       | 132-139           |
| L6                                   | 141-160       | 140-158           |
| αL6a (3 <sub>10</sub> <i>helix</i> ) | 149-152       | 149-151           |
| αL6b (3 <sub>10</sub> <i>helix</i> ) | 156-158       | 156-158           |
| β4                                   | 161-167       | 159-167           |
| L7                                   | 168-170       | 168-170           |
| β5                                   | 171-176       | 171-176           |
| L8                                   | 177-180       | 177-181           |
| β6                                   | 181-187       | 182-187           |
| L9                                   | 188-191       | 188-191           |
| β7                                   | 192-200       | 192-197           |

| Catalytic domain               |         |         |
|--------------------------------|---------|---------|
| L10                            | 201-207 | 198-207 |
| $\beta$ 8                      | 208-210 | 208-209 |
| L11                            | 211-220 | 210-220 |
| $\alpha$ L11 ( $3_{10}$ helix) | 213-218 | 213-215 |
| $\alpha$ 4                     | 221-231 | 221-231 |
| L12                            | 232-240 | 232-240 |
| $\beta$ 9                      | 241-242 | 241-242 |
| L13                            | 243-247 | 243-247 |
| $\alpha$ 5                     | 248-258 | 248-258 |
| L14                            | 259-260 | 259-260 |
| $\beta$ 10                     | 261-264 | 261-264 |
| L15                            | 265-280 | 265-280 |
| $\alpha$ 6                     | 281-290 | 281-290 |
| L16                            | 291-293 | 291-293 |
| $\beta$ 11                     | 294-296 | 294-296 |
| L17                            | 297-315 | 297-315 |
| $\alpha$ L17 ( $3_{10}$ helix) | 302-304 | 302-304 |
| $\beta$ 12                     | 316-319 | 316-319 |
| T1                             | 320     | 320     |
| $\alpha$ 7                     | 321-332 | 321-335 |
| C-terminal                     | 333-335 | 336-337 |

**Table S2** Comparison of average B-factors ( $\text{\AA}^2$ ) of the N-terminal fragment vs. total structure of the three states of FB Pase.

| $\langle B \rangle$ | <b>R</b> | <b>T(-AMP)</b> | <b>T(+AMP)</b> |
|---------------------|----------|----------------|----------------|
| N-terminal/Total    | 43 / 36  | 110 / 74       | 44 / 41        |

## References

Kabsch, W. & Sander, C. (1983). *Biopolymers* **22**, 2577-2637.

Savitzky, A. & Golay, M.J.E. (1964). *Anal. Chem.* **36**, 1627-1639.

Shi, R., Chen, Z-Y., Zhu, D-W., Li, C., Shan, Y., Xu, G. & Lin, S-X. (2013). *PLoS One* **8**, e71242.
